# Supplementary material
Source: HighWire-hosted journal article supplement (doi:10.1101/rna.073783.119)
Supplement: Supplemental_Data_Legends.docx [file Supplemental_Data_Legends.docx]

**Supplementary Figure 1.** Illustration of the interaction analysis using the X-ray crystal structure data of the human AGO2/AMP complex. (A) X-ray crystal structure of the human AGO2/AMP complex. The molecular surface of hydrophobic, polar, and basic residues in human AGO2 is shown in white, green, and blue, respectively. AMP is represented as a stick model. (B) 2D representation of the key interactions between AMP and human AGO2.

**Supplementary Figure 2.** Predicted binding mode of 8-Br AMP to human AGO2 MID domain and illustration of the interaction analysis. (A) Predicted 3D binding mode of 8-Br AMP to the human AGO2 MID domain. (B) 2D representation of the key interactions between 8-Br AMP and human AGO2 MID domain. Three hydrogen bonds shaded in yellow, and one electrostatic interaction shaded in orange are enhanced in 8-Br AMP.

**Supplementary Figure 3.** Comparison of the RNAi activity of Luciferase-targeting siRNAs, each bearing A, G, C, or U at the 5′-end of the guide strand. (A) 24 h. (B) 96 h. Percentage of the remaining luciferase activity in luciferase-expressing HeLa cells after 24 h or 96 h treatment with 100 pM siRNA. Data are represented as the means ± SD, n = 7.

**Supplementary Figure 4.** Ago2-associated guide strand copy number of 5′-A and 5′-6-mCEPh-purine. (A) Luc ex1 siRNA sequence. (B) Luc ex2 siRNA sequence. The amount of RISC-loaded guide strands was determined by immunoprecipitation of AGO2 from HeLa cells and qRT-PCR. siRNAs were transfected into cells at a concentration of 50 pM. Copies of guide strands were calculated per cell lysate. Data are represented as the means ± SD, n = 6.
