# Supplementary material
Source: HighWire-hosted journal article supplement (doi:10.1101/rna.073783.119)
Supplement: Supplemental_Information.docx [file Supplemental_Information.docx]

**Supplemental Information**

**siRNA potency enhancement via chemical modifications of nucleotide bases at the 5ʹ-end of the siRNA guide strand**

FUMIKAZU SHINOHARA1,2,3, TAIJI OASHI1, TOSHIMASA HARUMOTO1, TOMOYUKI NISHIKAWA1, YUKI TAKAYAMA1, HIKARU MIYAGI1, YUICHI TAKAHASHI1, TAKAHIRO NAKAJIMA1, TAKASHI SAWADA1, YASUO KODA1, ASANA MAKINO1, ATSUKO SATO1, KAORI HAMAGUCHI1, MICHIHIKO SUZUKI1, JUNICHIRO YAMAMOTO1, YUKIHIDE TOMARI2,3, AND JUN-ICHI SAITO1,*

1 Research Function Unit, R&D Division, Kyowa Kirin Co., Ltd., 1-9-2 Otemachi, Chiyoda-ku, Tokyo 100-0004, Japan

2 Laboratory of RNA Function, Institute for Quantitative Biosciences, The University of Tokyo, Bunkyo-ku, Tokyo 113-0032, Japan

3 Department of Computational Biology and Medical Sciences, Graduate School of Frontier Sciences, The University of Tokyo, Bunkyo-ku, Tokyo 113-0032, Japan

* To whom correspondence should be addressed. Tel: +81-55-989-8518; Fax: +81-55-986-7430; Email: [jun.saito.su@kyowakirin.com](mailto:jun.saito.su@kyowakirin.com)

**Running head:** siRNA potency enhancement via 5ʹ-end modification

**Supplementary MATERIALS AND METHODS**

**Synthesis of the phosphoramidite of** **6-mCEPh-purine (7) for oligo synthesis**

6-Chloro-9-((4aR,6R,7R,7aR)-2,2-di-*tert*-butyl-7-((*tert*-butyldimethylsilyl)oxy) tetrahydro-4*H*-furo[3,2-d][1,3,2]dioxasilin-6-yl)-9*H*-purine (**2**)

Di-*tert*-butylsilyl ditriflate (6.97 mL, 21.5 mmol) was added to a solution of 6-chloropurine riboside (**1**) (5.14 g, 17.9 mmol) in DMF (60 mL) at 0 °C and stirred for 2 h. The reaction mixture was quenched with saturated aqueous NaHCO3 and then extracted with ethyl acetate (100 mL × 2). The combined organic layers were washed with brine (100 mL), dried over Na2SO4, and evaporated. The residue was dissolved in DMF (60 mL), and the mixture was added to 1H-imidazole (3.05 g, 44.8 mmol) and tert-butyldimethylsilyl chloride (3.24 g, 21.5 mmol). The reaction mixture was stirred at 60 °C for 1 h; this was followed by the addition of 1H-imidazole (3.05 g, 44.8 mmol) and tert-butyldimethylsilyl chloride (3.24 g, 21.5 mmol). The reaction mixture was stirred at 60 °C for 1 h, quenched with saturated aqueous NaHCO3, and extracted with ethyl acetate (150 mL × 2). The combined organic layers were washed with brine (200 mL), dried over Na2SO4, and evaporated. The residue was purified by flash chromatography (n-heptane/ethyl acetate = 100/0 to 80/20) to obtain compound **2** (7.29 g, 75%) in the form of a pale-brown solid.

1H-NMR (400 MHz, CDCl3) δ: 8.74 (1H, s), 8.14 (1H, s), 5.98 (1H, s), 4.62 (1H, d, *J* = 4.6 Hz), 4.51 (1H, dd, *J* = 9.4, 5.3 Hz), 4.43 (1H, dd, *J* = 9.6, 4.6 Hz), 4.26 (1H, td, *J* = 10.1, 5.2 Hz), 4.03 (1H, t, *J* = 9.8 Hz), 1.07 (18H, dd, *J* = 13.5, 6.6 Hz), 0.94 (9H, d, *J* = 2.7 Hz), 0.16 (6H, dd, *J* = 6.4, 3.2 Hz).

Ethyl 3-(3-(9-((4aR,6R,7R,7aR)-2,2-di-*tert*-butyl-7-((*tert*-butyldimethylsilyl)oxy)tetrahydro-4*H*-furo[3,2-d][1,3,2]dioxasilin-6-yl)-9*H*-purin-6-yl)phenyl)propanoate (**3**)

3-(2-Ethoxycarbonylethyl)phenylboronic acid (1.04 g, 4.98 mmol), Cs2CO3 (3.26 g, 9.98 mmol), and [1,1ʹ-bis(diphenylphosphino)ferrocene]palladium(II) dichloride dichloromethane adduct (272 mg, 0.332 mmol) were added to a solution of compound **2** (900 mg, 1.66 mmol) in 1,4-dioxane (15 mL)/H2O (1.5 mL). The reaction mixture was stirred at 80 °C for 2 h, quenched with saturated aqueous NaHCO3 (40 mL × 3), and extracted with ethyl acetate (40 mL × 3). The combined organic layers were washed with brine (80 mL), dried over Na2SO4, and evaporated. The residue was purified by flash chromatography (chloroform/methanol = 100/1 to 99/1) to obtain compound **3** (905 mg, 81%) in the form of a whiteish-brown solid.

1H-NMR (400 MHz, CDCl3) δ: 8.98 (1H, s), 8.64 (1H, d, *J* = 7.8 Hz), 8.59 (1H, s), 8.14 (1H, s), 7.49 (1H, t, *J* = 7.8 Hz), 7.38 (1H, d, *J* = 8.2 Hz), 6.05 (1H, s), 4.66 (1H, d, *J* = 4.6 Hz), 4.55-4.49 (2H, m), 4.27 (1H, td, *J* = 10.1, 5.0 Hz), 4.06 (1H, t, *J* = 9.8 Hz), 3.68 (3H, s), 3.10 (2H, t, *J* = 7.8 Hz), 2.73 (2H, t, *J* = 7.8 Hz), 1.09 (9H, s), 1.06 (9H, s), 0.96 (9H, s), 0.20 (3H, s), 0.17 (3H, s).

2-Cyanoethyl 3-(3-(9-((2R,3R,4R,5R)-3-((*tert*-butyldimethylsilyl)oxy)-4-((di-*tert*-butylsilyl)oxy)-5-(hydroxymethyl)tetrahydrofuran-2-yl)-9*H*-purin-6-yl)phenyl)propanoate (**4**)

Lithium hydroxide monohydrate (114 mg, 2.71 mmol) was added to a solution of compound **3** (905 mg, 1.35 mmol) in THF (6.0 mL)/EtOH (4.0 mL). The reaction mixture was stirred for 7 h at 25 °C, quenched with saturated aqueous NH4Cl, and extracted with ethyl acetate (60 mL × 2). The combined organic layers were washed with brine (80 mL), dried over Na2SO4, and evaporated. The residue was dissolved in DMF (10 mL) and the mixture was added to 3-hydroxypropionitrile (0.199 mL, 2.94 mmol), 1-(3-dimethylaminopropyl)-3-ethylcarbodiimide hydrochloride (423 mg, 2.21 mmol), 1-hydroxybenzotriazole (338 mg, 2.21 mmol), and N,N-diisopropylethylamine (0.771 mL, 4.42 mmol). The reaction mixture was stirred overnight at room temperature, quenched using saturated aqueous NaHCO3, and extracted with ethyl acetate (60 mL × 2). The combined organic layers were washed with brine (80 mL), dried over Na2SO4, and evaporated. The residue was purified by flash chromatography (*n*-heptane/ethyl acetate = 70/30 to 50/50) to obtain compound **4** (563 mg, 54%) in the form of a white solid.

1H-NMR (400 MHz, CDCl3) δ: 9.00 (1H, s), 8.71 (1H, dt, *J* = 7.8, 1.4 Hz), 8.62 (1H, s), 8.18 (1H, s), 7.52 (1H, t, *J* = 7.8 Hz), 7.41 (1H, d, *J* = 7.8 Hz), 6.09 (1H, dd, *J* = 11.7, 2.1 Hz), 5.90 (1H, d, *J* = 7.3 Hz), 5.16 (1H, dd, *J* = 7.3, 4.1 Hz), 4.73 (1H, d, *J* = 4.1 Hz), 4.38 (1H, s), 4.30 (2H, t, *J* = 6.4 Hz), 4.02 (1H, dd, *J* = 11.2, 2.1 Hz), 3.82 (1H, td, *J* = 12.4, 1.7 Hz), 3.12 (2H, t, *J* = 7.8 Hz), 2.80 (2H, t, *J* = 7.8 Hz), 2.69 (2H, t, *J* = 6.4 Hz), 2.33 (1H, s), 1.09 (18H, s), 0.77 (9H, s), -0.17 (3H, s), -0.50 (3H, s).

2-Cyanoethyl 3-(3-(9-((2R,3R,4R,5R)-3-((*tert*-butyldimethylsilyl)oxy)-4-hydroxy-5-(hydroxymethyl)tetrahydrofuran-2-yl)-9*H*-purin-6-yl)phenyl)propanoate (**5**)

To a solution of compound **4** (530 mg, 0.749 mmol) in dichloromethane (8.0 mL), pyridine (1.21 mL, 15.0 mmol) and 65 wt% hydrogen fluoride-pyridine (0.209 mL, 7.49 mmol) were added. The reaction mixture was stirred overnight at room temperature and then quenched with saturated aqueous NaHCO3 and extracted with ethyl acetate (60 mL × 2). The combined organic layers were washed with brine (80 mL), dried over Na2SO4, and evaporated. The residue was purified by flash chromatography (*n*-heptane/ethyl acetate = 50/50 to 30/70) to obtain compound **5** (248 mg, 58%) in the form of a white solid.

1H-NMR (400 MHz, CDCl3) δ: 9.01 (1H, s), 8.71 (1H, dt, *J* = 7.9, 1.5 Hz), 8.64 (1H, s), 8.14 (1H, s), 7.52 (1H, t, *J* = 7.8 Hz), 7.42 (1H, d, *J* = 8.2 Hz), 5.99 (1H, dd, *J* = 12.1, 2.1 Hz), 5.88 (1H, d, *J* = 7.3 Hz), 5.21 (1H, dd, *J* = 7.3, 4.6 Hz), 4.40 (2H, t, *J* = 5.3 Hz), 4.30 (2H, t, *J* = 6.4 Hz), 4.01 (1H, dt, *J* = 12.8, 1.8 Hz), 3.80 (1H, td, *J* = 12.6, 1.2 Hz), 3.12 (2H, t, *J* = 7.8 Hz), 2.81 (3H, dd, *J* = 9.4, 5.7 Hz), 2.69 (2H, t, *J* = 6.2 Hz), 0.80 (9H, s), -0.18 (3H, s), -0.40 (3H, s)

2-Cyanoethyl 3-(3-(9-((2R,3R,4R,5R)-5-((bis(4-methoxyphenyl)(phenyl)methoxy)methyl)-3-((*tert-*butyldimethylsilyl)oxy)-4-hydroxytetrahydrofuran-2-yl)-9*H*-purin-6-yl)phenyl)propanoate (**6**)

To a solution of compound **5** (248 mg, 0.437 mmol) in pyridine (4.0 mL), 4,4ʹ-dimethoxytrityl chloride (222 mg, 0.655 mmol) was added. The reaction mixture was stirred for 4 h at room temperature and then quenched with saturated aqueous NaHCO3 and extracted with ethyl acetate (60 mL × 2). The combined organic layers were washed with brine (80 mL), dried over Na2SO4, and evaporated. The residue was purified by flash chromatography (*n*-heptane/ethyl acetate = 80/20 to 20/80) to obtain compound **6** (315 mg, 83%) in the form of a white solid.

1H-NMR (400 MHz, CDCl3) δ: 8.92 (1H, s), 8.69 (1H, d, *J* = 7.8 Hz), 8.60 (1H, s), 8.36 (1H, s), 7.52-7.20 (11H, m), 6.82 (4H, td, J = 6.0, 3.7 Hz), 6-mCEPh-purine (1H, d, J = 5.5 Hz), 5.05 (1H, t, J = 5.3 Hz), 4.38 (1H, q, J = 4.3 Hz), 4.31-4.26 (3H, m), 3.78 (6H, s), 3.57 (1H, dd, J = 10.5, 3.2 Hz), 3.40 (1H, dd, J = 10.8, 3.9 Hz), 3.12 (2H, t, J = 7.8 Hz), 2.80 (2H, t, J = 7.8 Hz), 2.70 (1H, d, J = 4.6 Hz), 2.65 (2H, t, J = 6.4 Hz), 0.84 (9H, s), 0.00 (3H, s), -0.13 (3H, s).

2-Cyanoethyl 3-(3-(9-((2R,3R,4R,5R)-5-((bis(4-methoxyphenyl)(phenyl)methoxy)methyl)-3-((*tert*-butyldimethylsilyl)oxy)-4-(((2-cyanoethoxy)(diisopropylamino)phosphanyl)oxy)tetrahydrofuran-2-yl)-9*H*-purin-6-yl)phenyl)propanoate (amidite **7**)

To a solution of compound **6** (315 mg, 0.362 mmol) in THF (4 mL), N,N-diisopropylethylamine (0.379 mL, 2.17 mmol) and 2-cyanoethyl diisopropylchlorophosphoramidite (1.63 g, 4.99 mmol) were added at 0 °C and stirred for 1 h at room temperature. This was followed by the addition of N,N-diisopropylethylamine (0.379 mL, 2.17 mmol) and 2-cyanoethyl diisopropylchlorophosphoramidite (1.63 g, 4.99 mmol) at 0 °C, which was stirred for 2 h at room temperature. Saturated aqueous NaHCO3 (1 mL) and water (1 mL) were then added, after which the mixture was filtered through Presep™ (diatomaceous earth) and evaporated. The residue was purified by flash chromatography (*n*-heptane/ethyl acetate containing 1% triethylamine = 40/60 to 20/80) to obtain amidite **7** (285 mg, 74%) in the form of a white solid.

1H-NMR (400 MHz, CDCl3) δ: 8.91, 8.89 (1H, 2 s), 8.72-8.57 (2H, m), 8.38, 8.34 (1H, 2 s), 7.53-7.45 (3H, m), 7.41-7.33 (5H, m), 7.32-7.19 (3H, m), 6.85-6.79 (4H, m), 6.19-6.09 (1H, m), 5.15-5.09 (1H, m), 4.49-4.35 (2H, m), 4.31-4.24 (2H, m), 4.03-3.84 (1H, m), 3.76 (6H, s), 3.68-3.55 (4H, m), 3.38-3.28 (1H, m), 3.15-3.08 (2H, m), 2.83-2.77 (2H, m), 2.69-2.62 (3H, m), 2.34-2.27 (1H, m), 1.24-1.02 (12H, m), 0.76, 0.75 (9H, 2 s), -0.01, -0.05, -0.20, -0.20 (6H, 4 s).

**Synthesis of the phosphoramidite 6-mCEPh-purine monomer (12)**

Methyl 3-(3-(9-((3aR,4R,6R,6aR)-6-(hydroxymethyl)-2,2-dimethyltetrahydrofuro[3,4-d][1,3]dioxol-4-yl)-9*H*-purin-6-yl)phenyl)propanoate (**9**)

To a solution of compound **8** (720 mg, 2.40 mmol) in 1,4-dioxane/H2O (10/1, 24 mL), 3-(2-methoxycarbonylethyl)benzeneboronic acid (751 mg, 3.61 mmol), Cs2CO3 (2.34 g, 7.18 mmol), and 1,1ʹ-bis(diphenylphosphino)ferrocene-palladium(II)dichloride dichloromethane complex (195 mg, 0.238 mmol) were added and stirred under an atmosphere of Ar at 80 °C for 6.5 h. The reaction mixture was quenched with saturated aqueous NaHCO3 (10 mL) and water (20 mL), followed by extraction with ethyl acetate (50 mL × 2). The combined organic layers were dried over Na2SO4 and evaporated. The residue was purified by flash chromatography (chloroform/methanol containing 1% triethylamine = 10/0 to 10/1) to obtain compound **9** (957 mg, 88%) in the form of a pale-yellow oil.

1H-NMR (CDCl3, 400 MHz) δ (ppm): 8.98 (s, 1H), 8.66 (ddd, *J* = 7.8, 1.4, 1.4 Hz, 1H), 8.61-8.58 (m, 1H), 8.17 (s, 1H), 7.50 (t, *J* = 7.8 Hz, 1H), 7.40 (d, *J* = 7.8 Hz, 1H), 5.98 (d, *J* = 4.6 Hz, 1H), 5.77 (d, J = 10.1 Hz, 1H), 5.30 (t, *J* = 5.5 Hz, 1H), 5.17 (dd, *J* = 5.5, 1.4 Hz, 1H), 4.58 (d, *J* = 1.8 Hz, 1H), 4.02 (d, *J* = 12.8 Hz, 1H), 3.84 (dt, *J* = 12.8, 1.8 Hz, 1H), 3.69 (s, 3H), 3.10 (t, *J* = 7.8 Hz, 2H), 2.73 (t, *J* = 7.8 Hz, 2H), 1.68 (s, 3H), 1.40 (s, 3H)

Methyl 3-(3-(9-((3aR,4R,6R,6aR)-6-(((di-*tert-*butoxyphosphoryl)oxy)methyl)-2,2-dimethyltetrahydrofuro[3,4-d][1,3]dioxol-4-yl)-9*H*-purin-6-yl)phenyl)propanoate (**10**)

1H-tetrazole (369 mg, 5.26 mmol) and di-tert-butyl N,N-diisopropylphosphoramidite (1.31 mL, 4.21 mmol) were added to a solution of compound **9** (957 mg, 2.11 mmol) in CH2Cl2 (21 mL) and stirred at room temperature for 30 min. This was followed by the addition of mCPBA (1.45 g, 8.42 mmol) at 0 °C and stirring at room temperature for 50 min. The reaction mixture was filtered through Celite® and evaporated. The residue was purified by flash chromatography (n-heptane/ethyl acetate = 2/1 to 0/1) to obtain compound **10** (1.09 g, 80%) in the form of a yellow oil.

1H-NMR (CDCl3, 400 MHz) δ (ppm): 9.03 (s, 1H), 8.66 (ddd, *J* = 7.8, 1.4, 1.4 Hz, 1H), 8.61-8.59 (m, 1H), 8.34 (s, 1H), 7.49 (t, *J* = 7.8 Hz, 1H), 7.39-7.36 (m, 1H), 6.29 (d, *J* = 2.7 Hz, 1H), 5.43 (dd, *J* = 6.0, 2.7 Hz, 1H), 5.12 (dd, *J* = 6.0, 3.0 Hz, 1H), 4.56-4.53 (m, 1H), 4.24-4.11 (m, 2H), 3.69 (s, 3H), 3.10 (t, *J* = 7.8 Hz, 2H), 2.73 (t, *J* = 7.8 Hz, 2H), 1.66 (s, 3H), 1.45 (s, 9H), 1.42 (s, 9H), 1.41 (s, 3H).

Methyl 3-(3-(9-((2R,3R,4S,5R)-3,4-dihydroxy-5-((phosphonooxy)methyl)tetrahydrofuran-2-yl)-9*H*-purin-6-yl)phenyl)propanoate (**11**)

A solution of compound **10** (1.09 g, 1.69 mmol) in TFA/H2O (1/1, 30 mL) was stirred at room temperature for 35 min. The reaction mixture was then evaporated and quenched with 0.5 mol/L triethylammonium hydrogen carbonate solution (10 mL), followed by evaporation. The residue was purified by reversed-phase liquid chromatography (0.01 mol/L ammonium acetate solution/methanol = 1/0 to 2/8) to obtain compound **11** (618 mg, 68%) in the form of a white solid.

1H-NMR (D2O, 400 MHz) δ (ppm): 8.85 (s, 1H), 8.79 (s, 1H), 8.03-8.01 (m, 2H), 7.49 (t, *J* = 7.6 Hz, 1H), 7.44-7.42 (m, 1H), 6.27 (d, J = 5.5 Hz, 1H), 4.81-4.80 (m, 1H), 4.54 (dd, *J* = 5.0, 4.1 Hz, 1H), 4.43-4.40 (m, 1H), 4.21-4.12 (m, 2H), 3.65 (s, 3H), 3.01 (t, *J* = 7.3 Hz, 2H), 2.77 (t, J = 7.3 Hz, 2H)

3-(3-(9-((2R,3R,4S,5R)-3,4-Dihydroxy-5-((phosphonooxy)methyl)tetrahydrofuran-2-yl)-9*H*-purin-6-yl)phenyl)propanoic acid (**12**; 6-mCEPh-purine)

A solution of compound **11** (618 mg, 1.25 mmol) in 1 mol/L aqueous NaOH (10 mL, 10 mmol) was stirred at room temperature for 13 min. The cooled reaction mixture was quenched with 1 mol/L triethylammonium hydrogen carbonate solution (2 mL) and evaporated. The methanol azeotroped residue was purified by reversed-phase liquid chromatography (Chromatrex ODS, 0.01 mol/L ammonium acetate solution/methanol = 1/0 to 2/8) to afford partially purified compound **12** (598 mg). Partially purified compound **12** (598 mg) was recrystallized from EtOH (2.0 mL) and ethyl acetate (30 mL) to obtain compound **12** (containing 25 wt% triethylamine; 504 mg, 63%) in the form of a white solid.

ESI-MS (m/z): 479.41 [M-H].1H-NMR (D2O, 400 MHz) δ (ppm): 8.79 (s, 1H), 8.70 (s, 1H), 7.96-7.93 (m, 2H), 7.42 (t, *J* = 7.3 Hz, 1H), 7.39-7.37 (m, 1H), 6.18 (d, *J* = 5.5 Hz, 1H), 4.71 (d, *J* = 5.5 Hz, 1H), 4.44 (d, *J* = 4.6 Hz, 1H), 4.33-4.31 (m, 1H), 4.11-4.00 (m, 2H), 2.91 (t, *J* = 7.8 Hz, 2H), 2.56 (t, *J* = 7.8 Hz, 2H).

31P-NMR (D2O, 162 MHz) δ (ppm): -1.07

**Synthesis of the phosphoramidite of 6-PBuS-purine (16) for oligo synthesis**

(2R,3S,5R)-2-((bis(4-methoxphenyl)(phenyl)methoxy)methyl)-5-(6-(4-hydroxybutylthio)-9H-purin-9-yl)tetrahydrofuran-3-ol (**14**)

Compound **13** was synthesized as described previously (Bae et al. 2007); 7.80 g (11.6 mmol) of **13** was dissolved in ethanol (120 mL), after which N,N-diisopropylethylamine (11.1 mL, 63.9 mmol) and 4-mercapto-l -butanol (4.79 mL, 46.4 mmol) were added to the mixture and stirred at 60 °C. for 12 h. The reaction solution was extracted with ethyl acetate and dried with anhydrous magnesium sulfate. The solvent was evaporated from the reaction solution under reduced pressure, and the residue was purified by hexane/ethyl acetate column chromatography to obtain compound **14** (5.90 mg, 79%) as a white solid.

ESI-MS (m/z): 643 (Μ+1)

1H-NMR (400 MHz, CDCl3) δ: 8.62 (1H, s), 8.10 (1H, s), 7.39-7.18 (9H, m), 6.80 (4H, d, *J* = 8.7 Hz), 6.45 (1H, t, *J* = 6.4 Hz), 4.68 (1H, dt, *J* = 9.8, 4.0 Hz), 4.13 (1H, q, *J* = 4.4 Hz), 3.78 (6H, s), 3.74 (2H, q, *J* = 6.1 Hz), 3.44-3.35 (4H, m), 2.88-2.81 (1H, m), 2.56-2.53 (1H, m), 2.23 (1H, t, *J* = 6.0 Hz), 2.08 (1H, d, *J* = 3.2 Hz), 1.95-1.88 (2H, m), 1.78-1.71 (2H, m).

(2R,3S,5R)-2-((bis(4-methoxyphenyl)(phenyl)methoxy)methyl)-5-(6-(4-hydroxybutylthio)-9H-purin-9-yl)tetrahydrofuran-3-ol (**15**)

Compound **14** (5.90 g, 9.18 mmol) was dissolved in dichloromethane (120 mL), after which triethylamine (6.40 mL, 45.9 mmol) and 4,4′-dimethoxytritylchloride (3.88 g, 11.5 mmol) were added to the mixture and stirred overnight at room temperature. Methanol was added to the reaction solution, which was then stirred for 30 min. The reaction solution was extracted with chloroform and dried with anhydrous magnesium sulfate. The solvent was evaporated under reduced pressure, and the residue was purified by hexane/ethyl acetate column chromatography to obtain compound **15** (6.56 g, 76%) as a white solid.

1H-NMR (400 MHz, CDCl3) δ: 8.59 (s, 1H), 8.08 (s, 1H), 7.13-7.44 (m, 18H), 6.78-6.82 (m, 8H), 6.45 (t, *J* = 6.5 Hz, 1H), 4.65-4.70 (m, 1H), 4.11-4.14 (m, 1H), 3.77 (s, 12H), 3.41-3.45 (m, 1H), 3.35-3.39 (m, 3H), 3.10 (t, *J* = 6.2 Hz, 1H), 2.81-2.87 (m, 1H) , 1.98-2.01 (m, 1H), 2.51-2.57 (m, 1H), 1.86-1.93 (m, 2H), 1.76-1.83 (m, 2H).

(2*R*,3*S*,5*R*)-5-(6-((4-(bis(4-methoxyphenyl)(phenyl)methoxy)butyl)thio)-9*H*-purin-9-yl)-2-((bis(4-methoxyphenyl)(phenyl)methoxy)methyl)tetrahydrofuran-3-yl (2-cyanoethyl) diisopropylphosphoramidite (**16**)

Compound **15** (6.56 g, 6.94 mmol) was dissolved in THF (104 mL), after which N,N-diisopropylethylamine(3.63 mL, 20.8 mmol) and 2-cyanoethyl diisopropylchlorophosphoramidite (2.33 mL, 4.99 mmol) were added at 0 °C to the mixture and stirred for 1 h at room temperature. This was followed by another addition of N,N-diisopropylethylamine (0.379 mL, 2.17 mmol) and 2-cyanoethyl diisopropylchlorophosphoramidite (1.86 mL, 10.44 mmol) at 0 °C, after which the mixture was stirred for 2 h at room temperature. Saturated aqueous NaHCO3 (50 mL) and water (50 mL) were then added. The reaction solution was extracted with ethyl acetate and dried with anhydrous magnesium sulfate. The solvent was evaporated under reduced pressure, and the residue was purified by hexane/ethyl acetate containing 1% triethylamine column chromatography to obtain amidite **16** (5.25 g, 66%) as a white solid.

1H-NMR (400 MHz, CDCl3) δ: 8.59, 8.59 (1H, 2 s), 8.14, 8.11 (1H, 2 s), 7.44-7.16 (18H, m), 6.83-6.76 (8H, m), 6.48-6.44 (1H, m), 4.79-4.71 (1H, m), 4.31-4.29 (1H, m), 3.95-3.55 (16H, m), 3.43-3.31 (4H, m), 3.11-3.09 (2H, m), 2.90-2.87 (1H, m), 2.68-2.61 (2H, m), 2.47-2.45 (1H, m), 1.94-1.86 (2H, m), 1.83-1.76 (2H, m), 1.20-1.11 (12H, m).

**General oligonucleotide synthesis and purification**

Oligonucleotides shown in Supplementary Table 1 were synthesized on a scale of 0.2 µmol using nucleic acid synthesizerRNA-CPG (Glen Research Corporation, Sterling, VA), Universal Support III (Glen Research Corporation), or UnySupport1000 (Glen Research Corporation) as a solid-phase support.

DMT-2ʹ-O-TBDMS-rA(Pac) amidite (Glen Research Corporation), DMT-2ʹ-O-TBDMS-rG(iPr-Pac) amidite (Glen Research Corporation), DMT-2ʹ-O-TBDMS-rC(ac) amidite (Glen Research Corporation), DMT-2ʹ-O-TBDMS-rU amidite (Glen Research Corporation), and Chemical Phosphorylation Reagent II (Glen Research Corporation) were individually prepared in 0.1 mol/L acetonitrile and used for the condensation reaction. As an activating agent of phosphoramidites, Activator 42 (SAFC-PROLIGO) was used. After synthesis in trityl-off mode, the oligonucleotides were deprotected by treatment with 1.5% DBU in CH3CN (1 mL; room temperature for 10 h) and subsequently cleaved from the solid support by treatment with AMA (0.3 mL; 65 °C for 10 min).

The reaction mixture was concentrated under reduced pressure, after which 31% triethylamine trihydrofluoride (50 µL) and DMSO (150 µL) were added, and the resulting mixture was allowed to stand at 65 °C for 2.5 h. The reaction mixture was quenched with 3 mol/L sodium acetate (50 µL) and the oligonucleotides were precipitated with n-butanol (600 µL) at −20 °C for 30 min. The oligonucleotides were pelleted by centrifugation (15500 × *g*, 10 min) and washed twice with ethanol (500 µL), followed by purification by reversed-phase liquid chromatography (XBridge C18, 4.6 mm × 250 mm; Waters, Milford, MA; gradient by A solution, 100 mM triethyl amine/acetic acid buffer and B solution, acetonitrile) to obtain a target oligonucleotide. The structure of the oligonucleotide was determined by polyvalent ion analysis (deconvolution) using liquid chromatography-mass spectrometry (LC-MS; Agilent G6120A Quadrupole LC/MS system). The resulting single-stranded oligonucleotide was dissolved in a mixed buffer (10 mM Tris, 50 mM sodium chloride, and 1 mM ethylenediamine tetraacetic acid) to obtain a nucleic acid concentration of 20 µmol/L. Equal amounts of passenger and guide strands were mixed together and incubated at 85 °C for 5 min. The temperature of the mixture was gradually decreased and the mixture was incubated at 37 °C for 1 h to obtain a double-stranded oligonucleotide.

**Supplementary Table 1. siRNAs used in this study**

| **siRNA** | **strand** | **5′-3′** |
| --- | --- | --- |
| Luc-A | passenger | GGAUAGCAAGACCGACUAUCA |
| guide | p-AUAGUCGGUCUUGCUAUCCAU |
| Luc-G | passenger | GGAUAGCAAGACCGACUACCA |
| guide | p-GUAGUCGGUCUUGCUAUCCAU |
| Luc-C | passenger | GGAUAGCAAGACCGACUAGCA |
| guide | p-CUAGUCGGUCUUGCUAUCCAU |
| Luc-U | passenger | GGAUAGCAAGACCGACUAACA |
| guide | p-UUAGUCGGUCUUGCUAUCCAU |
| Luc-6-mCEPh-purine | passenger | GGAUAGCAAGACCGACUAUCA |
| guide | p-6-mCEPh-purineUAGUCGGUCUUGCUAUCCAU |
| Luc1-A | passenger | UGCAGCGAGAAUAGCUUGUAG |
| guide | p-ACAAGCUAUUCUCGCUGCACA |
| Luc1-G | passenger | UGCAGCGAGAAUAGCUUGCAG |
| guide | p-GCAAGCUAUUCUCGCUGCACA |
| Luc1-C | passenger | UGCAGCGAGAAUAGCUUGGAG |
| guide | p-CCAAGCUAUUCUCGCUGCACA |
| Luc1-U | passenger | UGCAGCGAGAAUAGCUUGAAG |
| guide | p-UCAAGCUAUUCUCGCUGCACA |
| Luc1-6-mCEPh-purine | passenger | UGCAGCGAGAAUAGCUUGUAG |
| guide | P-6-mCEPh-purineCAAGCUAUUCUCGCUGCACA |
| Luc9-A | passenger | GACGAGGUGCCUAAAGGAUUG |
| guide | p-AUCCUUUAGGCACCUCGUCCA |
| Luc9-6-mCEPh-purine | passenger | GACGAGGUGCCUAAAGGAUUG |
| guide | p-6-mCEPh-purineUCCUUUAGGCACCUCGUCCA |
| Luc9-6-PBuS-purine | passenger | GACGAGGUGCCUAAAGGAUUG |
| guide | p-6-PBuS-purineUCCUUUAGGCACCUCGUCCA |
| Luc ex1-A | passenger | CCGUCGUAUUCGUGAGCAAGA |
| guide | AUGCUCACGAAUACGACGGUG |
| Luc ex1  -6-mCEPh-purine | passenger | CCGUCGUAUUCGUGAGCAAGA |
| guide | 6-mCEPh-purineUGCUCACGAAUACGACGGUG |
| Luc ex2-A | passenger | GGCUGAAGAGCCUGAUCAAAU |
| guide | AUGAUCAGGCUCUUCAGCCGG |
| Luc ex2  -6-mCEPh-purine | passenger | GGCUGAAGAGCCUGAUCAAAU |
| guide | 6-mCEPh-purineUGAUCAGGCUCUUCAGCCGG |
| ApoB-A | passenger | AAUCAAGUGUCAUCACACUGA |
| guide | p-AGUGUGAUGACACUUGAUUUA |
| ApoB-6-mCEPh-purine | passenger | AAUCAAGUGUCAUCACACUGA |
| guide | p-6-mCEPh-purineGUGUGAUGACACUUGAUUUA |
| ApoB-6-PBuS-purine | passenger | AAUCAAGUGUCAUCACACUGA |
| guide | p-6-PBuS-purineGUGUGAUGACACUUGAUUUA |

p- represents phosphoric acid at the 5ʹ-end. 6-mCEPh-purine or 6-PBuS-purine is an analogue.

**Supplementary Table 2. AMP analogue candidates predicted to have additional interactions with AGO2**

| **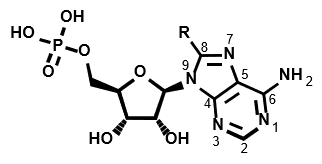** |  | **R** | **Fragname** | **Efrag** | **Efp** | **Efc** |
| --- | --- | --- | --- | --- | --- | --- |
| 1 | 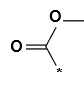 | -EsterMe | -2.74 | -2.74 | 0.00 |
| 2 | 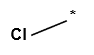 | -C1 | -2.43 | -2.43 | 0.00 |
| 3 | 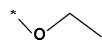 | -OEt | -2.38 | -2.38 | 0.00 |
| 4 | 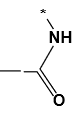 | -revAmide | -2.08 | -2.08 | 0.00 |
| 5 | 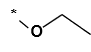 | -OEt | -2.03 | -2.52 | 0.49 |
| 6 | 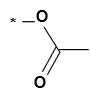 | -revAcetic | -2.01 | -2.01 | 0.00 |
| 7 | 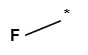 | -F | -1.91 | -1.91 | 0.00 |
| 8 | 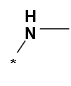 | -NHMe | -1.66 | -1.66 | 0.00 |
| 9 | 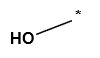 | -OH | -1.65 | -1.65 | 0.00 |
| 10 | 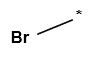 | -Br | -1.62 | -1.62 | 0.00 |
| 11 | 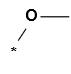 | -OMe | -1.59 | -2.02 | 0.44 |
| 12 | 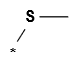 | -SMe | -1.56 | -2.04 | 0.48 |
| 13 | 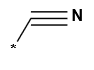 | -Nitrile | -1.42 | -1.42 | 0.00 |
| 14 | 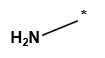 | -NH2 | -1.30 | -1.30 | 0.00 |

Efp is the sum of the inter-molecular van der Waals and electrostatic interaction energy between the R-group and AGO2. Efc is the sum of the intra-molecular van der Waals and electrostatic interaction energy between the R-group and scaffold within a ligand. Efrag is the sum of Efp and Efc, where a negative value indicates that the R-group has a favorable interaction with AGO2. The unit of energy is kcal/mol.

**Supplementary Table 3.** **Statistics for X-ray crystallographic data collection and refinement.**

|  | Ago2-MID/8-Br AMP | Ago2-MID/6-mCEPh-purine |
| --- | --- | --- |
| PDB ID | 7D7U | 7C6B |
| *Data collection* | |  |
| X-ray source | Photon Factory  ARNW12A | Photon Factory  BL17A |
| Space group | *P*1 | *P*1 |
| Cell dimensions  *a, b, c* (Å) *α, β, γ* (°) | 47.17, 65.77, 40.79  105.83, 96.46, 87.56 | 47.28, 66.46, 40.42  107.06, 95.63, 86.40 |
| Resolutions (Å) | 31.31 - 2.00 (2.05 - 2.00) | 38.51 - 1.70 (1.73 - 1.70) |
| *R*merge (%) | 10.7 (75.8) | 7.9 (157.1) |
| Mean *I*/*σ*(*I*) | 4.2 (0.8) | 9.1 (0.5) |
| *CC*1/2 | 0.989 (0.450) | 0.995 (0.406) |
| Completeness (%) | 94.6 (93.9) | 99.8 (99.6) |
| Multiplicity | 2.0 (2.0) | 3.2 (2.9) |
| *Refinement* | |  |
| Resolution (Å) | 30.00 - 2.00 (2.05 - 2.00) | 38.51 - 1.70 (1.74 - 1.70) |
| Number of reflections | 28,480 (2,128) | 48,783 (3,583) |
| *R*work / *R*free (%) | 20.4 / 24.7 (33.8 / 37.4) | 19.4 / 22.9 (36.3 / 33.3) |
| Number of atoms | 3,401 | 3,520 |
| Ago2-MID | 3,119 | 3,128 |
| Nucleotide | 72 | 99 |
| Water | 210 | 283 |
| Mean B value |  |  |
| Ago2-MID | 32.3 | 45.8 |
| Nucleotide | 34.6 | 59.5 |
| Water | 29.9 | 51.2 |
| RMSD |  |  |
| Bond lengths (Å) | 0.009 | 0.010 |
| Bond angles (°) | 1.546 | 1.718 |
| Ramachandran plot |  |  |
| Favored (%) | 97.2 | 99.0 |
| Allowed (%) | 2.8 | 1.0 |
| Disallowed (%) | 0.0 | 0.0 |

Values in parentheses are for the highest resolution shell.
